# Supplementary material for: Holey Au–Ag alloy nanoplates with built-in hotspots for surface-enhanced Raman scattering
Source: Royal Society of Chemistry journal article supplement (doi:10.1039/c6nr04866h), 2016-01-01
Supplement: c6nr04866h1.pdf [file c6nr04866h1.pdf]

## Electronic Supplementary Information (ESI)

# Holey Au-Ag Alloy Nanoplates with Built-in Hotspots for Surface-Enhanced Raman Scattering

Xinyu Wei,<sup>a</sup> Qikui Fan,<sup>a</sup> Hongpo Liu,<sup>a</sup> Yaocai Bai,<sup>c</sup> Lei Zhang,<sup>a</sup> Haoquan Zheng,<sup>b</sup> Yadong Yin,<sup>c</sup> and Chuanbo Gao<sup>\*a</sup>

<sup>a</sup>Center for Materials Chemistry, Frontier Institute of Science and Technology, Xi'an Jiaotong University, Xi'an, Shaanxi 710054, China;

<sup>b</sup>Department of Materials and Environmental Chemistry, Stockholm University, Stockholm 10691, Sweden;

<sup>c</sup>Department of Chemistry, University of California, Riverside, California 92521, United States.

\*Email: gaochuanbo@mail.xjtu.edu.cn

## 1. Additional Experimental Details

**1.1 Synthesis of Au-Ag nanoframes by galvanic replacement between Ag nanoplates and HAuCl<sub>4</sub>:** In a typical synthesis, Ag nanoplates were centrifuged from 20 mL of the as-synthesized solution (Preparation, see Experimental Section) and redispersed in 3 mL of H<sub>2</sub>O. Then, 2.0 mL of HAuCl<sub>4</sub> (0.1 mM) was introduced by using a syringe pump at a rate of 5 mL/h with vigorous stirring. The Au-Ag nanoframes were collected by centrifugation and washed with H<sub>2</sub>O. An intermediate was obtained by changing the amount of HAuCl<sub>4</sub> (0.1 mM) to be 1.0 mL in a typical experiment.

**1.2 Synthesis of Ag@Au core/shell nanoplates:** In a typical synthesis (see our earlier report: *Adv. Funct. Mater.*, 2015, **25**, 5435), Ag nanoplates were centrifuged from 40 mL of their stock solution and redispersed in 2 mL of H<sub>2</sub>O. A solution (pH ~12) was prepared by mixing 2.55 mL of H<sub>2</sub>O, 1 mL of polyvinylpyrrolidone (PVP, 5 wt%, Mw 40 000), 200 µL of L-ascorbic acid (0.5 M), 200 µL of NaOH (0.5 M), 50 µL of Na<sub>2</sub>SO<sub>3</sub> (0.1 M), and 4 mL of the growth solution of Au (see Experimental Section) in a glass vial, which was then merged with the solution of the Ag nanoplates to initiate the seeded growth. The reaction was then allowed to proceed undisturbed at 30 °C for 12 h. Finally, Ag@Au core/shell nanoplates were collected by centrifugation and washed with H<sub>2</sub>O.

**1.3 SERS analysis in oxidative solutions:** Holey Au-Ag nanoplates was incubated with an aqueous solution containing CV (10<sup>-6</sup> M) and H<sub>2</sub>O<sub>2</sub> (0.2 M) for 2 h. Raman spectra were then

recorded from the suspension with a 633 nm He–Ne laser line at room temperature. For all measurements, laser power was 3 mW, and the signal acquisition time was fixed to be 30 s.

**1.4 Characterizations:** TEM was performed with a Hitachi HT-7700 electron microscope equipped with a tungsten filament, operating at 120 kV. HRTEM and STEM were performed on a Philips Tecnai F20 FEG-TEM, operating at 200 kV. UV–vis spectra were measured on an Ocean Optics HR2000+ES spectrophotometer. Elemental analysis was conducted by inductively coupled plasma mass spectrometry (ICP-MS) with an Agilent 7500CE. Raman spectra were collected using a LabRAM HR800 confocal Raman spectrophotometer equipped with a 633 nm He-Ne laser.

## 2. Calculation of the enhancement factor (EF) of the holey Au-Ag alloy nanoplates from Figure 5e.

The enhancement factor of the holey Au-Ag alloy nanoplates was estimated using the following equation:

$$EF = \left( \frac{I_{surface}}{N_{surface}} \right) / \left( \frac{I_{solution}}{N_{solution}} \right)$$

where  $I_{surface}$  and  $N_{surface}$  are the Raman intensity and numbers of CV ( $10^{-7}$  M) molecules absorbed on the holey Au-Ag alloy nanoplates on a silicon substrate.  $I_{solution}$  and  $N_{solution}$  are the Raman intensity probed from a CV ( $10^{-3}$  M) liquid in a capillary and numbers of CV molecules in the focus of the laser beam.

The Raman intensity  $I_{surface}$  was 2000 counts at the peak of  $1618 \text{ cm}^{-1}$  (laser power density:  $51.67 \text{ kW} \cdot \text{cm}^{-2}$ ).  $I_{solution}$  was measured to be 2500 counts (laser power density:  $39.8 \text{ kW} \cdot \text{cm}^{-2}$ ), which is equivalent to 3246 counts under laser irradiation at  $51.7 \text{ kW} \cdot \text{cm}^{-2}$ . Acquisition times were fixed to be 10 s for all measurements.

$N_{solution}$  was estimated using the following equation:

$$N_{solution} = 6.02 \times 10^{23} \text{ mol}^{-1} \times 10^{-3} \text{ mol/L} \times \left[ \pi \left( \frac{d}{2} \right)^2 \times H \right] = 1.8 \times 10^9$$

where  $d$  is the diameter of the laser spot,  $d = \frac{1.22\lambda}{0.25} = 3.1 \text{ } \mu\text{m}$ ;  $H$  is the effective depth of focus and can be estimated experimentally to be  $400 \text{ } \mu\text{m}$ .

$N_{surface}$  can be estimated as:

$$N_{surface} = D \times S_p \times N_l$$

where  $D$  is the density of the CV molecules absorbed on the silicon substrate and the holey Au-Ag alloy nanoplates, which is assumed to be a constant without preferential distribution.  $S_p$  is the effective surface area of a single holey Au-Ag alloy nanoplate, and can be estimated by a simplified model (edge length  $l = 45$  nm; thickness = 6 nm; perimeter of the holes = 360 nm; area of the holes =  $450 \text{ nm}^2$ ) to be  $2586 \text{ nm}^2$ .  $N_l$  is the number of the holey Au-Ag alloy nanoplates in the laser spot.

The area of the laser spot  $S_l = \pi \left(\frac{s}{2}\right)^2 = 5.8 \times 10^5 \text{ nm}^2$ , where  $s$  is the diameter of the laser spot,  $s = \frac{1.22\lambda}{0.9} = 858 \text{ nm}$ .

Thus,

$$N_l = \frac{S_l}{\frac{\sqrt{3}}{4} l^2} = 662$$

In the experiment,  $25 \mu\text{L}$  of an aqueous CV solution ( $10^{-7} \text{ M}$ ) was dried onto the substrate and dipped 3 times in water to remove weakly absorbed molecules. About  $\sim 6.8 \%$  of the CV molecules remained after dipping, as estimated experimentally (This value is assumed to be independent of the CV concentration, and was determined by UV-vis spectroscopy with CV of a high concentration).

Thus,

$$N_{CV} = 25 \times 10^{-6} \text{ L} \times 10^{-7} \text{ mol/L} \times 6.02 \times 10^{23} \text{ mol}^{-1} \times 6.8\% = 1.0 \times 10^{11}$$

Assume the holey Au-Ag alloy nanoplates covered all surface area of the substrate,

Thus,  $N_p$  (the number of the holey Au-Ag alloy nanoplates on the substrate) can be estimated to be:

$$N_p = \frac{S_{Si}}{\frac{\sqrt{3}}{4} l^2} = 7.3 \times 10^{10}$$

where  $S_{Si}$  is the surface area of the  $8 \text{ mm} \times 8 \text{ mm}$  substrate ( $6.4 \times 10^{13} \text{ nm}^2$ ).

Thus,  $D$  can be estimated by the following equation:

$$D = \frac{N_{cv}}{S_{si} + N_p \times 360 \times 6} = 4.5 \times 10^{-4} \text{ nm}^{-2}$$

Therefore,

$$N_{surface} = D \times S_p \times N_l = 770$$

$$EF = \left( \frac{I_{surface}}{N_{surface}} \right) / \left( \frac{I_{solution}}{N_{solution}} \right) \approx 1.4 \times 10^6$$

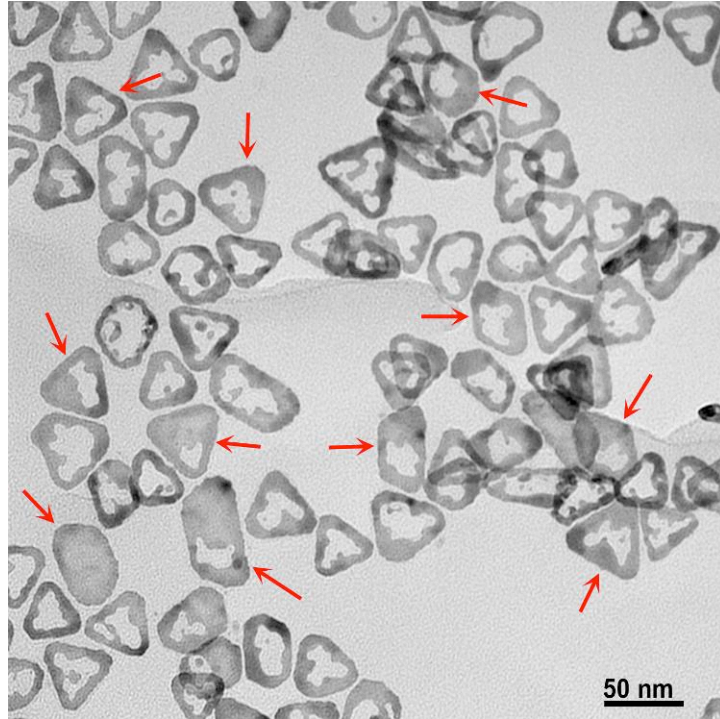

**Figure S1.** TEM image of hollow Au-Ag alloy nanoplates synthesized by galvanic replacement of Ag nanoplates with  $\text{HAuCl}_4$  in the absence of PVP. Arrows indicate the nanostructures at different stages of the galvanic replacement.

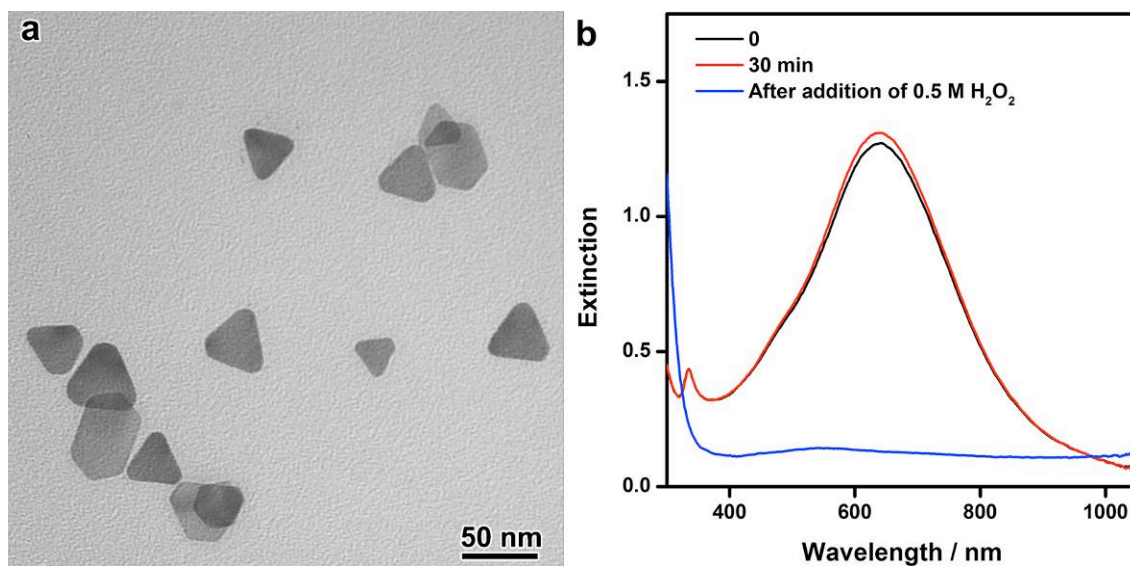

**Figure S2.** (a) TEM image of the Ag nanoplates after treatment with  $\text{Na}_3\text{Au}(\text{SO}_3)_2$  at pH 11. (b) UV-vis spectra of the Ag nanoplates (0 min), the Ag nanoplates after treatment with the sulfite-coordinated gold precursor for 30 min, and the nanoplates after further treatment with 0.5 M  $\text{H}_2\text{O}_2$ .

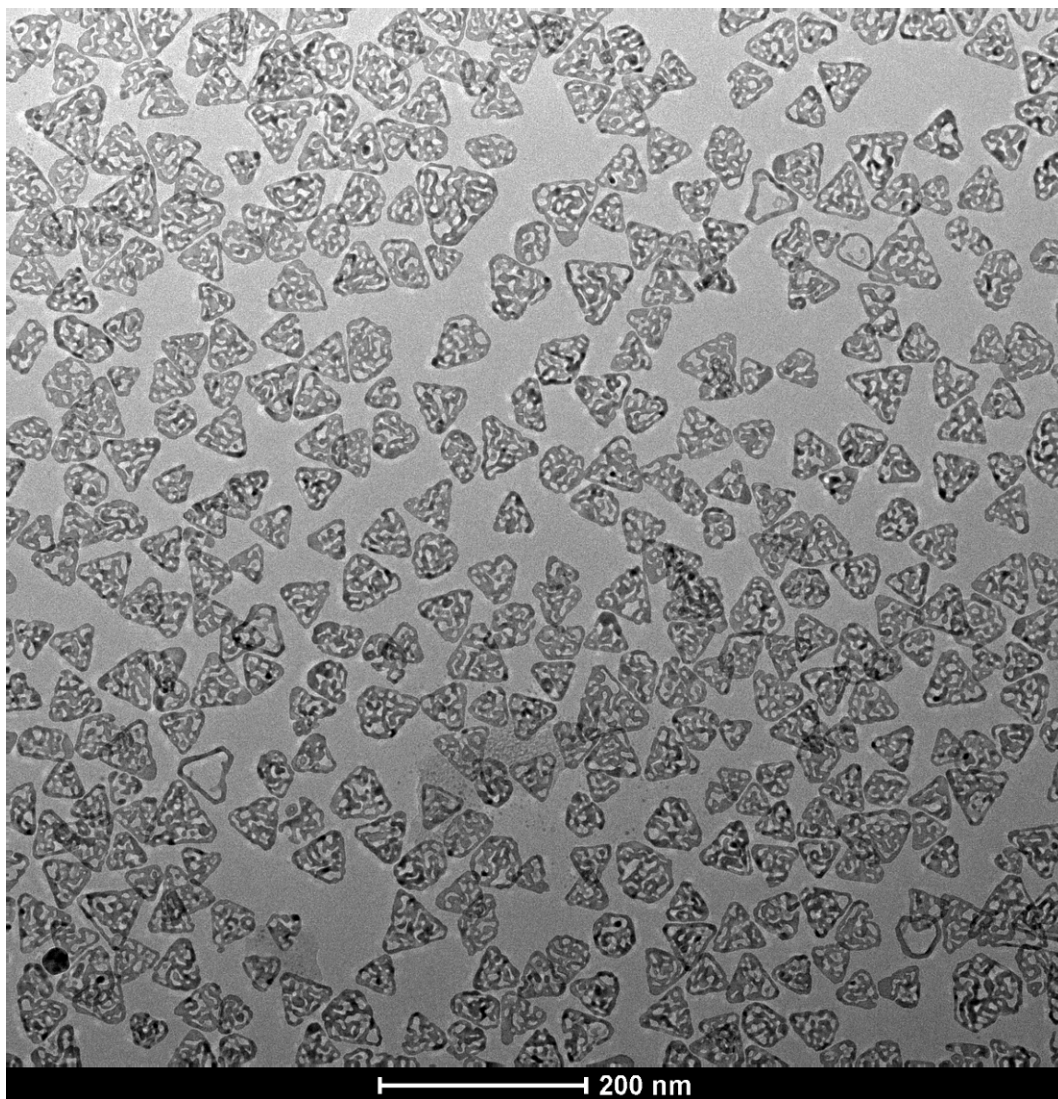

**Figure S3.** A low-magnification TEM image of the holey Au-Ag nanoplates.

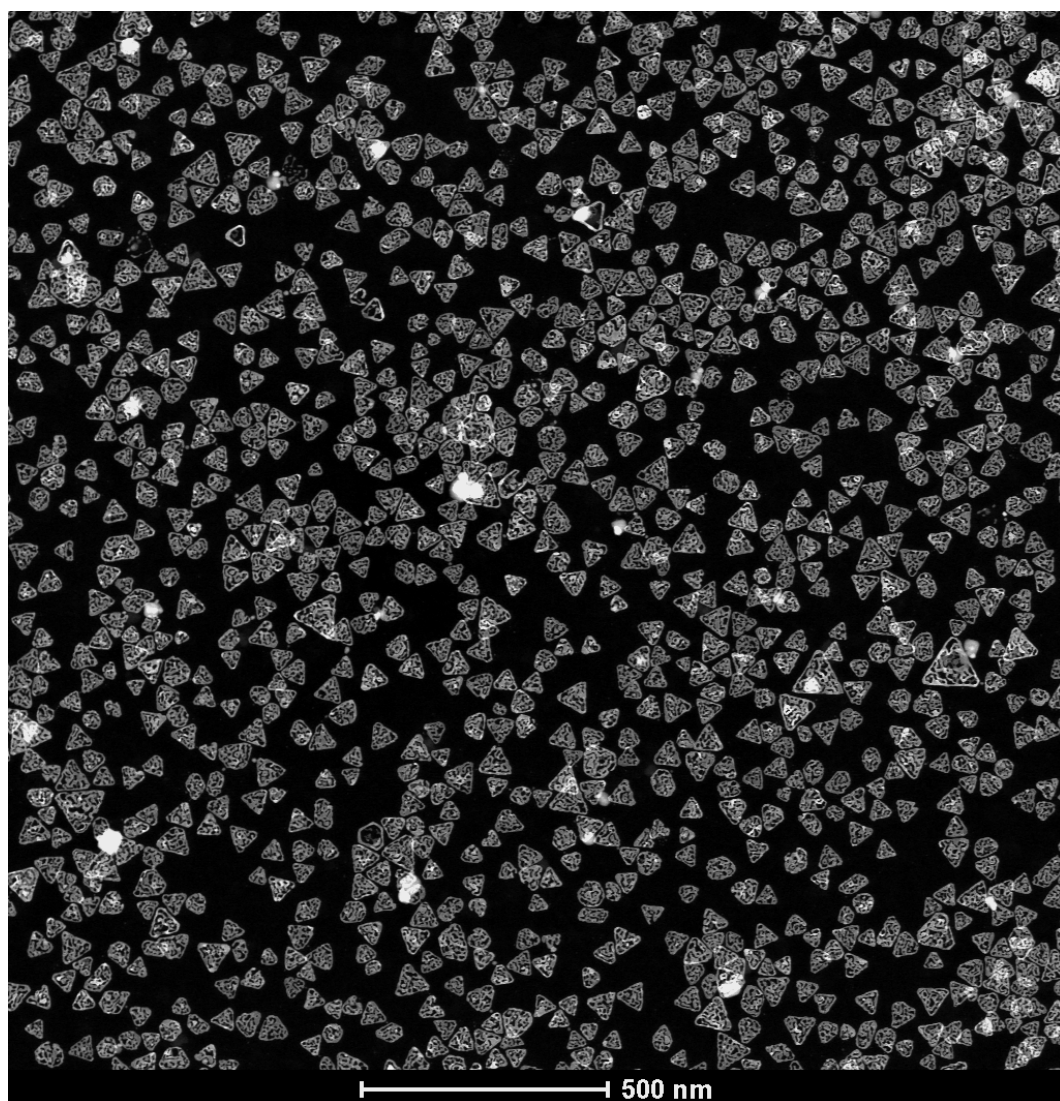

**Figure S4.** A low-magnification HAADF-STEM image of the holey Au-Ag nanoplates.
